# Supplementary material for: Visualization of Alternative Functional Configurations of Influenza Virus Hemagglutinin Facilitates Rapid Selection of Complementing Vaccines in Emergency Situations
Source: Int J Mol Sci. 2017 Apr 4;18(4):766. doi: 10.3390/ijms18040766 (PMC5412350; doi:10.3390/ijms18040766)
Supplement: Supplementary file 1 [file ijms-18-00766-s001.zip › Worksheet S1.xlsx]

## Sheet: Sheet1
		CSU iso-form								Virus CSU test		2014
cell block	CSU	Guangdong/1/96	Mexico/232/94	Anhui/1/2006	swan/Hungary/4999/2006	Ser-vac Flu	Egy Flu		cell block	CSU	Guangdong/1/96	Mexico/232/94	Anhui/1/2006	swan/Hungary/4999/2006	Ser-vac Flu (Egypt/M2583D/2010)	Egy Flu (Egypt/18-H/2009)
1B1C2B2C	CSU-1	a	a	a	b	b	b		1B1C2B2C	CSU-1	0	0	0	1	1	1
2D2E3D3E front	CSU-2	a	a	a	b	a	a		2D2E3D3E front	CSU-2	1	1	1	0	1	1
2E2F3F4F back	CSU-3	a	b	c	d	e	c		2E2F3F4F back	CSU-3	0	0	1	0	0	1
3B	CSU-4	a	a	a	a	a	a		3B	CSU-4	1	1	1	1	1	1
8B	CSU-5	a	b	c	c	c	a		8B	CSU-5	0	0	1	1	1	0
8D8E9D9E	CSU-6	a	b	a	c	c	d		8D8E9D9E	CSU-6	0	0	0	0	0	1
4G4H5G5H	CSU-7	a	b	a	a	c	a		4G4H5G5H	CSU-7	1	0	1	1	0	1
6F7F over anchor	CSU-8	a	a	a	a	b	a		6F7F over anchor	CSU-8	0	0	0	0	0	0
6A6B7A7B	CSU-9	a	a	b	a	a	a		6A6B7A7B	CSU-9	0	0	1	0	0	0
	CSU			Egypt/2014
1B1C2B2C	CSU-1			b
2D2E3D3E front	CSU-2			a
2E2F3F4F back	CSU-3			c
3B	CSU-4			a
8B	CSU-5			c
8D8E9D9E	CSU-6			d
4G4H5G5H	CSU-7			a
6F7F over anchor	CSU-8			c
6A6B7A7B	CSU-9			b
